# Supplementary figures and images for: Cloning and characterization of a novel alternatively spliced transcript of the human CHD7 putative helicase
Source: Springer Nature journal article supplement (doi:10.1186/1756-0500-3-252), 2010-10-06

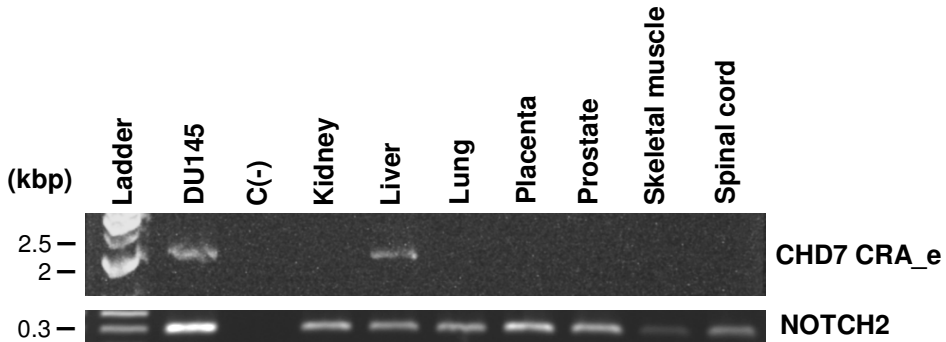

Supplement: 13104_2010_656_MOESM4_ESM.pdf [file 13104_2010_656_MOESM4_ESM.pdf]
